# Supplementary material for: Porcine Kidney Organoids Derived from Naïve-like Embryonic Stem Cells
Source: MDPI journal article supplement (doi:10.3390/ijms25010682), 2024-01-04

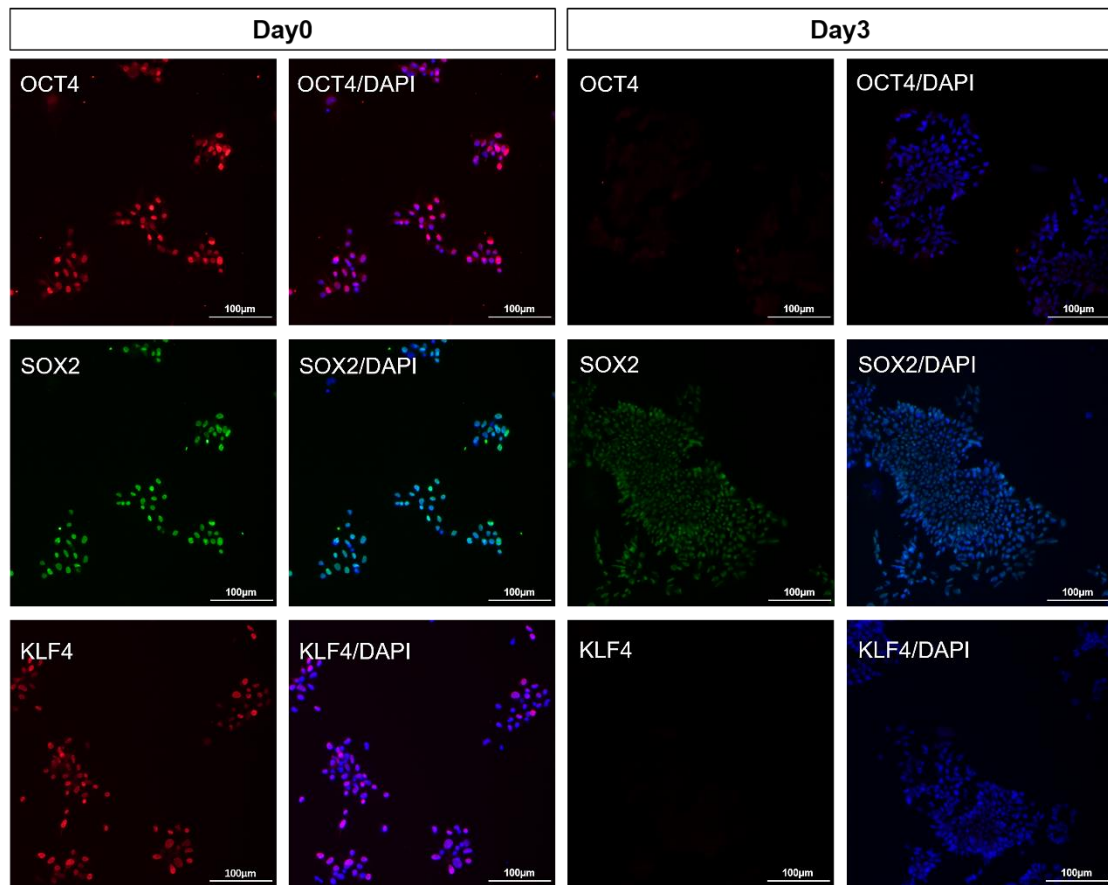

**Figure S1. The expression of pluripotency markers was decreased in nESCs after induction.** The expression of multipotent markers OCT4, SOX2, KLF4 of cell colonies on day 0 and day 3 were detected by immunofluorescence assay (scale bar:100µm).

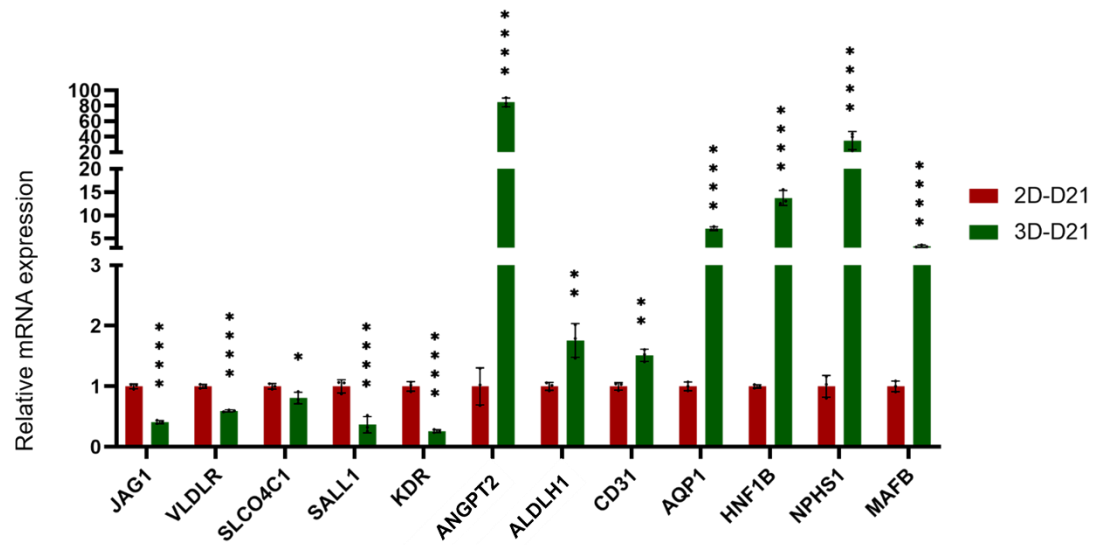

**Figure S2. Comparison of related gene expression levels between 2D culture and 3D culture on day 21.** The relative expression level of markers of nephron progenitor cells (JAG1, VLDLR, SLCO4C1, SALL1, KDR, ANGPT2) and mature nephron components (ALDLH1, CD31, AQP1, HNF1B, NPHS1, MAFB) were measured by Real-time PCR.

These un-cropped Western Blot membranes have been labeled with molecular weights, target protein and they belong to figure 2C in new version.

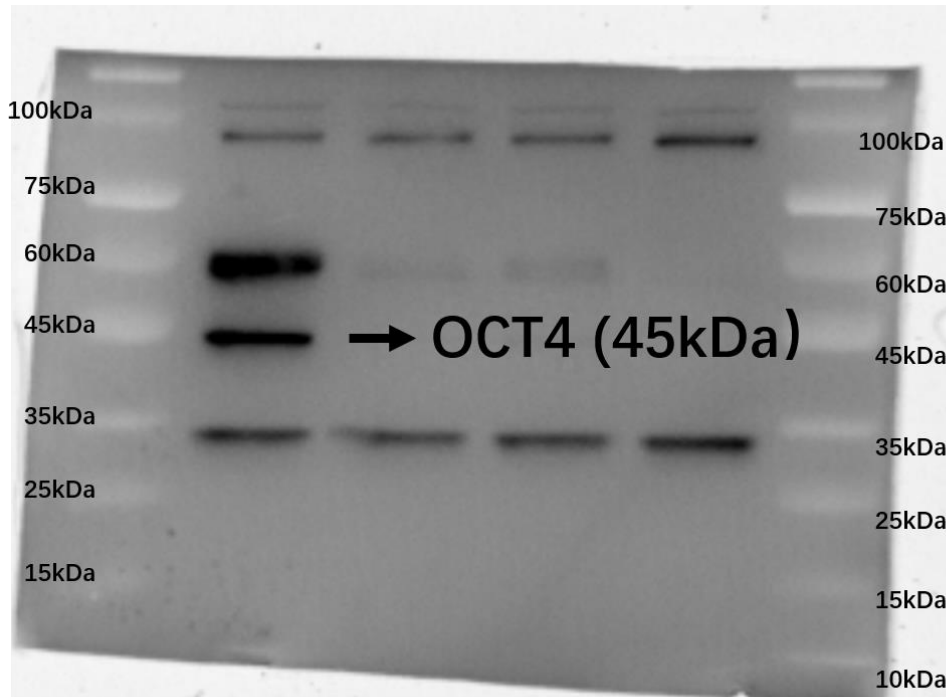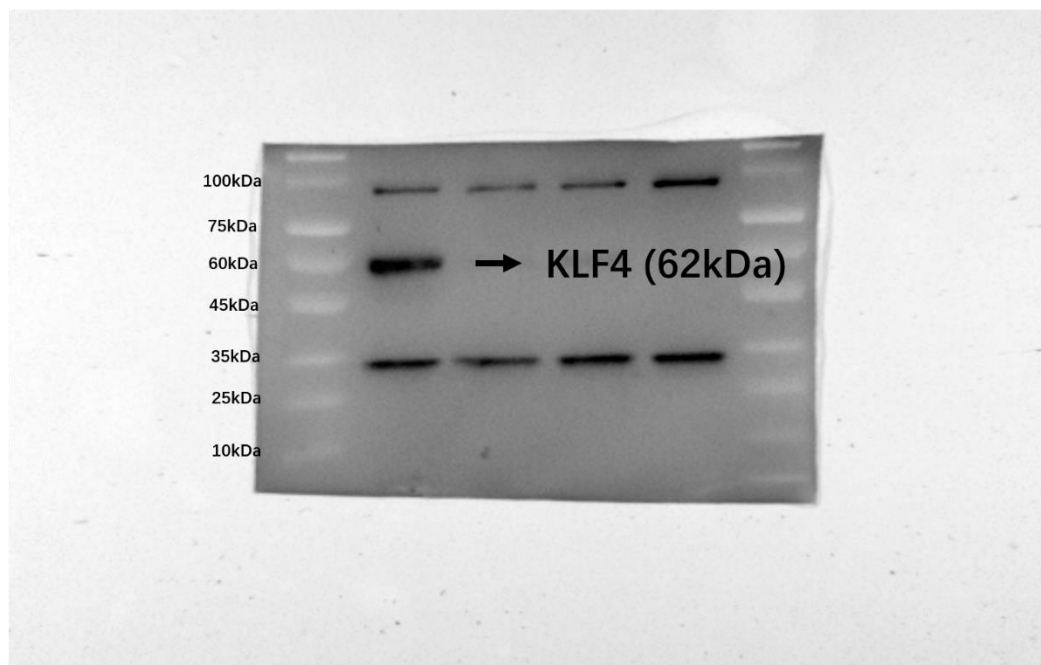

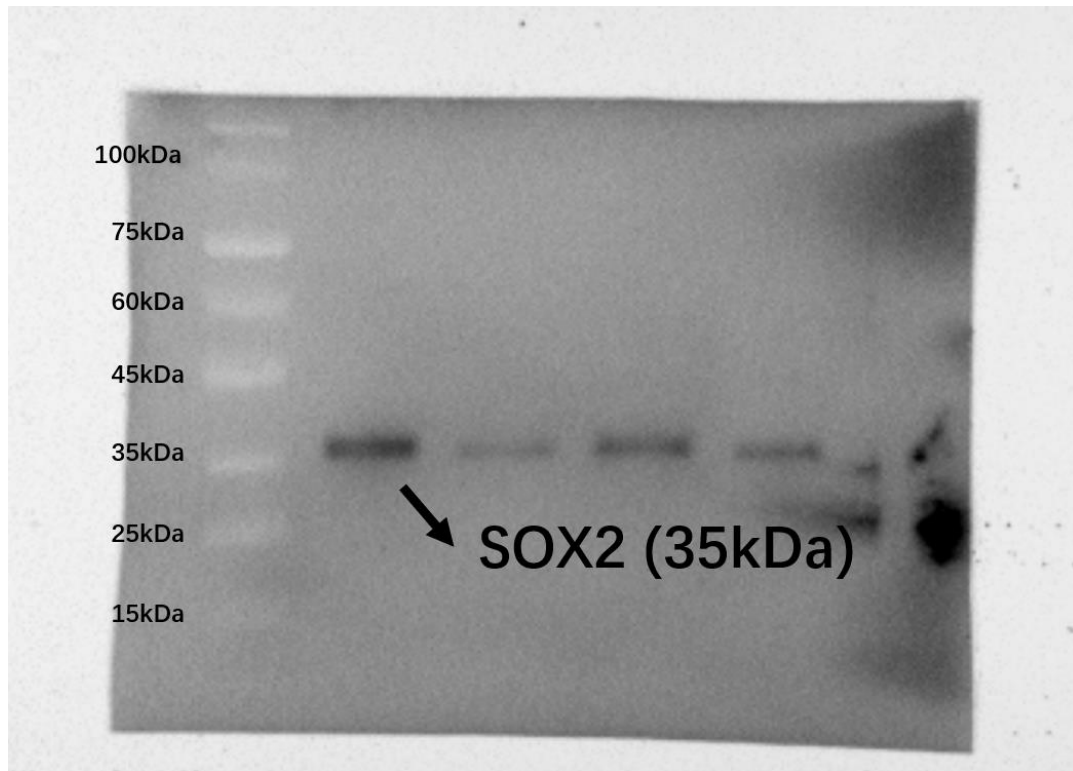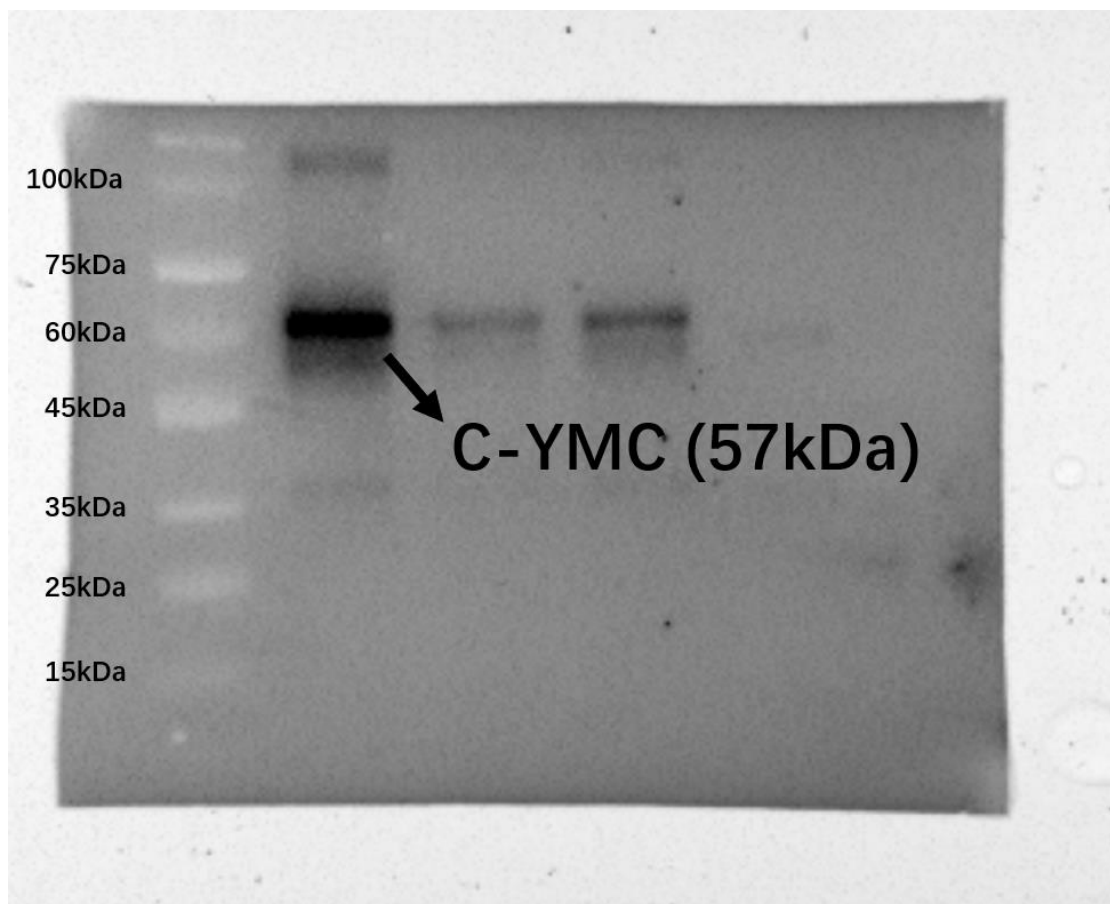

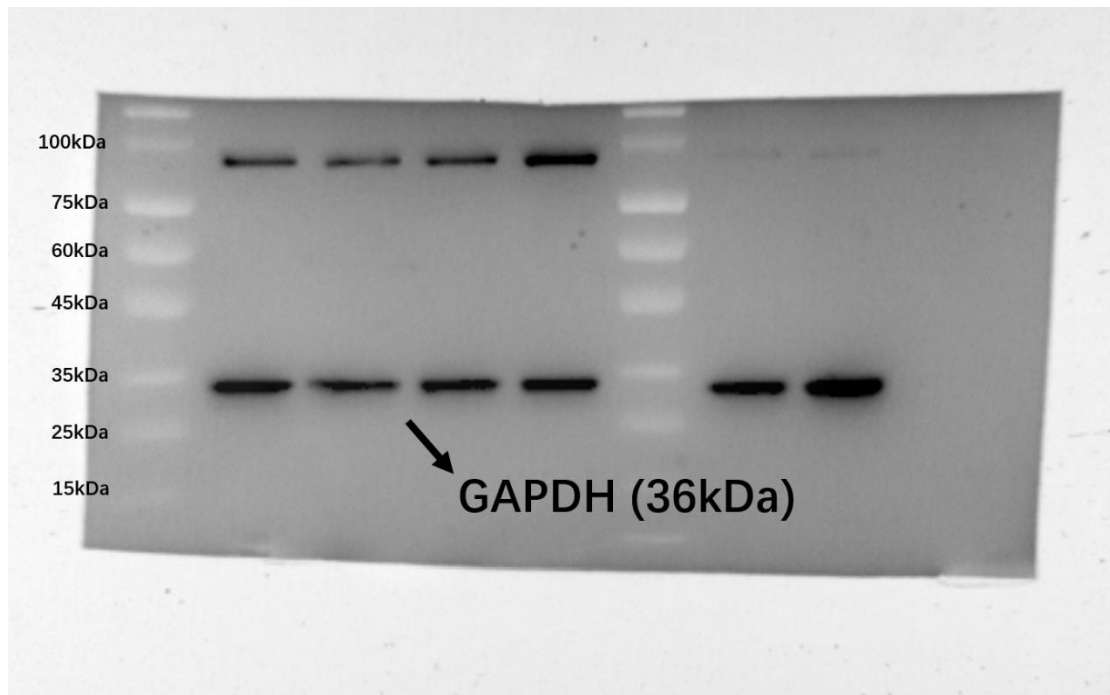

Supplement: s1 [file s1]
